# Supplementary material
Source: publisher figshare collection journal article supplement (https://karger.figshare.com/articles/dataset/_/11889843)
Supplement: Supplementary file 1 [file 1 › NEN505922_sm1.pdf]

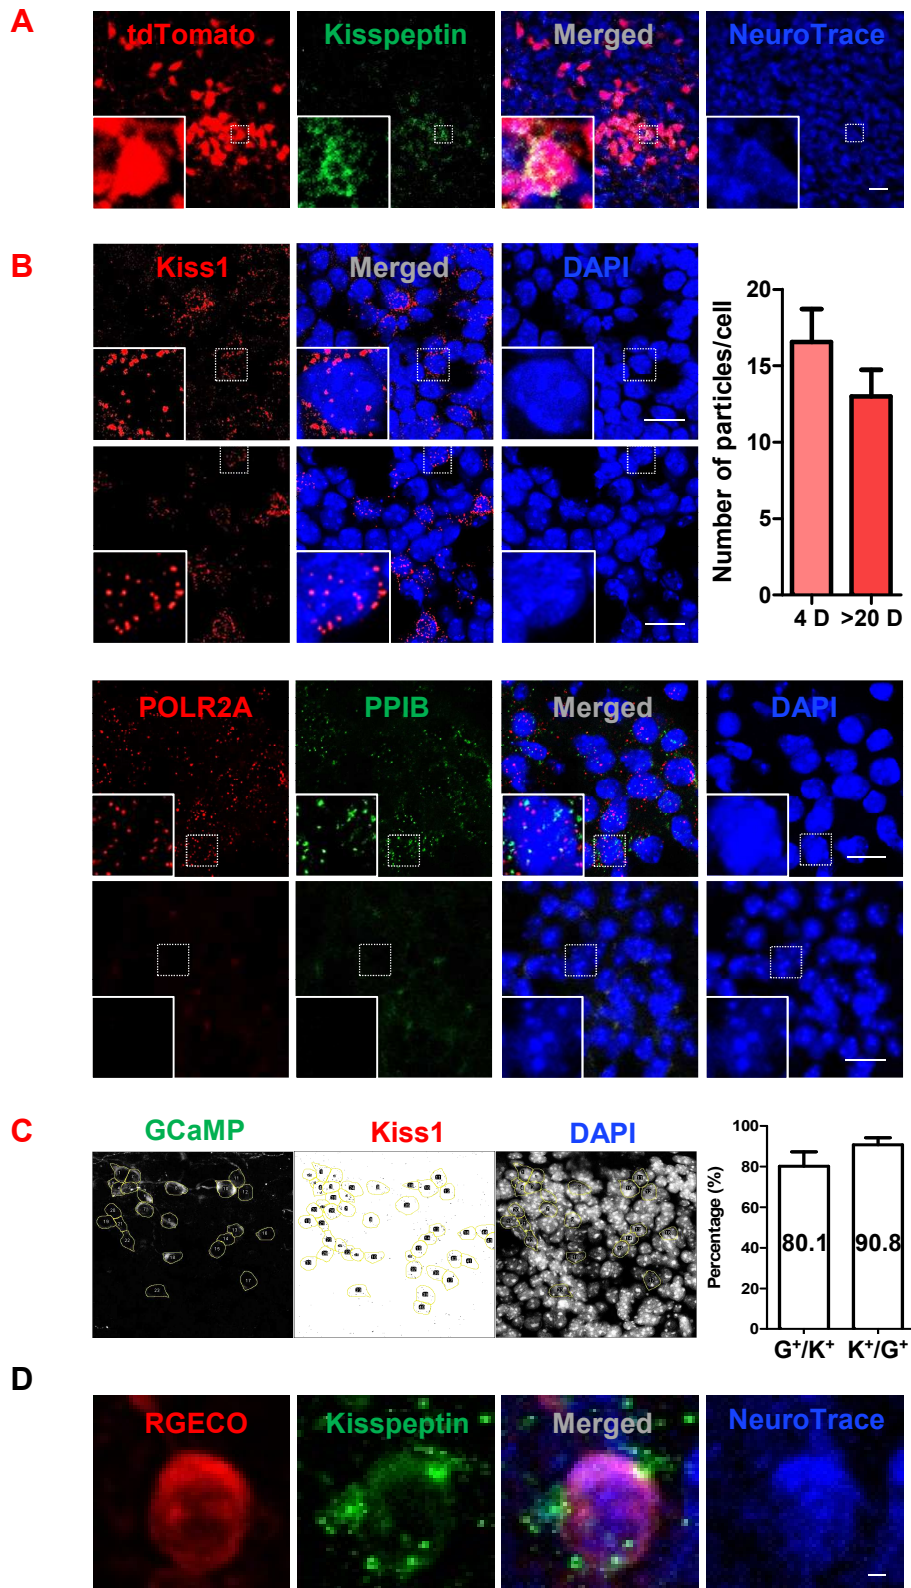

### Supplementary Figure S1.

(A) Immunostaining of *Kiss1*-IRES-Cre/tdTomato mice at postnatal day 7 with kisspeptin antiserum (14 slices from 2 mice). Scale bar 20  $\mu$ m. (B) FISH performed at the beginning (4 days, 4D) and more than 20 days after culture (>20D). The number of *Kiss1* particles per cell are analyzed using 5 slices from 3 mice (2 males and 1 female) for 4D and 5 slices from 5 mice (3 males and 2 females) for >20D. Positive and negative control experiments are also shown. Scale bar 20  $\mu$ m. (C) Analysis of GCaMP-expressing kisspeptin neurons and kisspeptin positive neurons from GCaMP-expressing cells after culture. Percentage was calculated using 11 slices from 9 mice (7 males and 2 females). (D) Immunostaining using kisspeptin antiserum on RGEKO-transduced neuron in the organotypic slice culture. Scale bar 2  $\mu$ m.

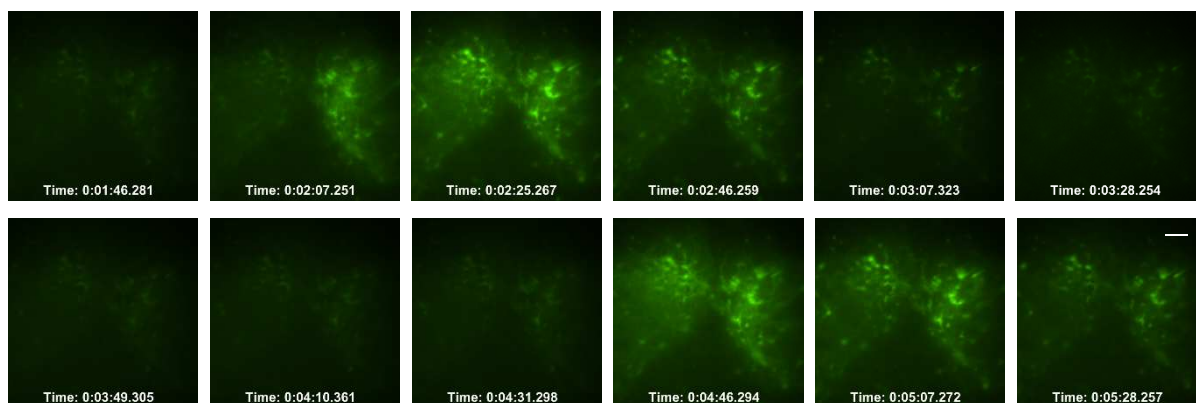

**Supplementary Figure S2.**  
Time-series snapshot of GCaMP activity. Scale bar 100  $\mu\text{m}$ .

## Mouse #1

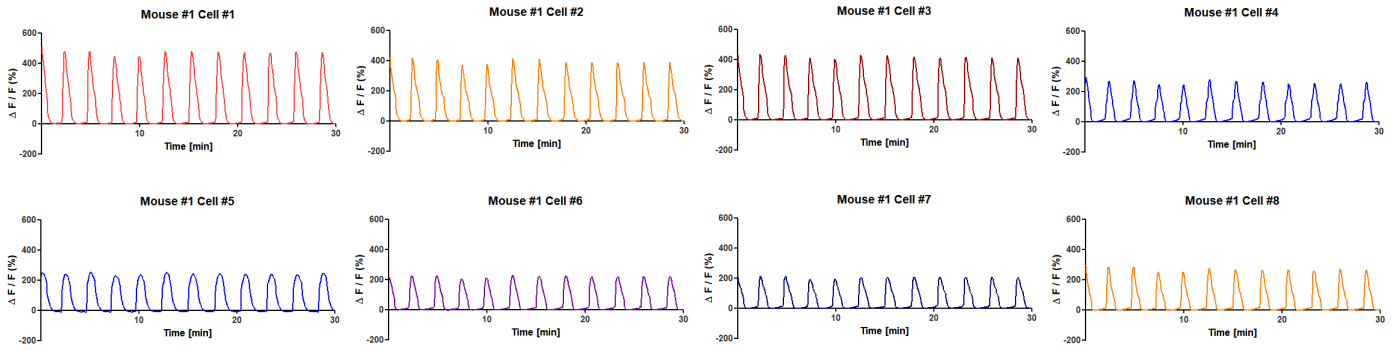

## Mouse #2

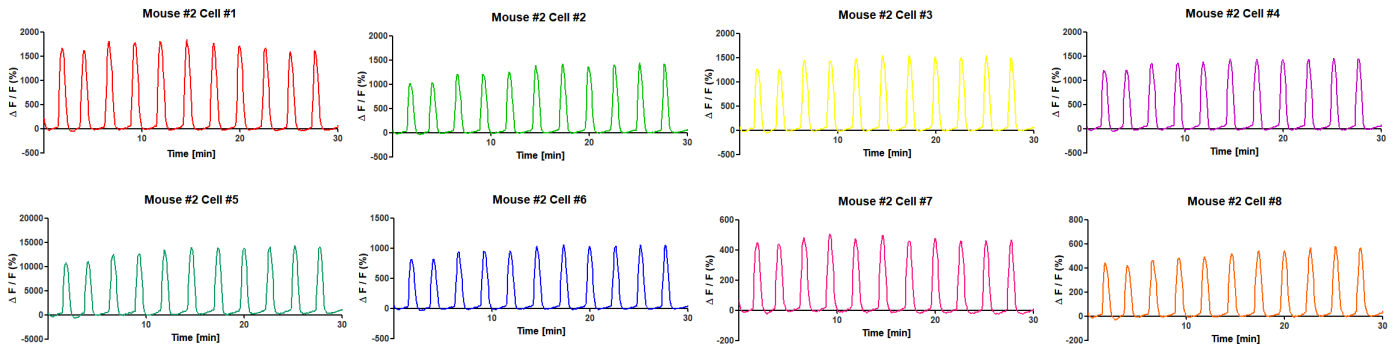

## Mouse #3

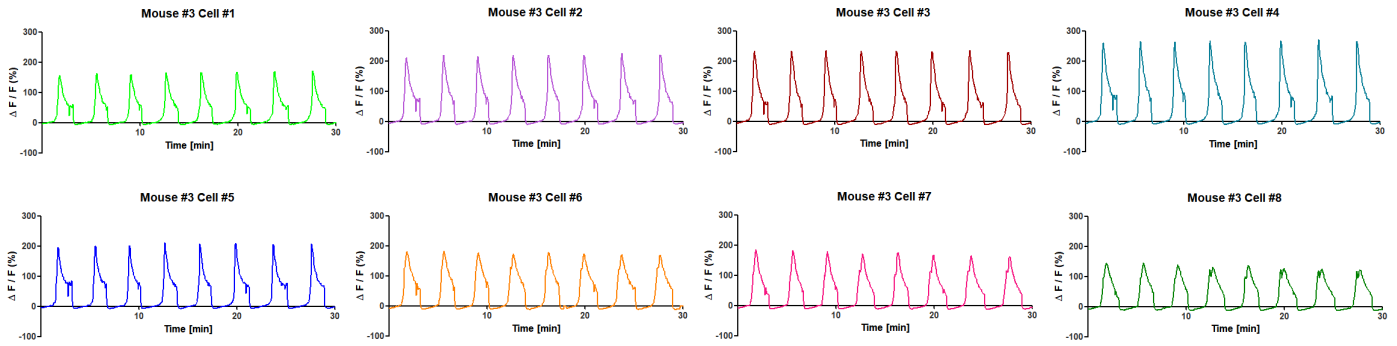

## Mouse #4

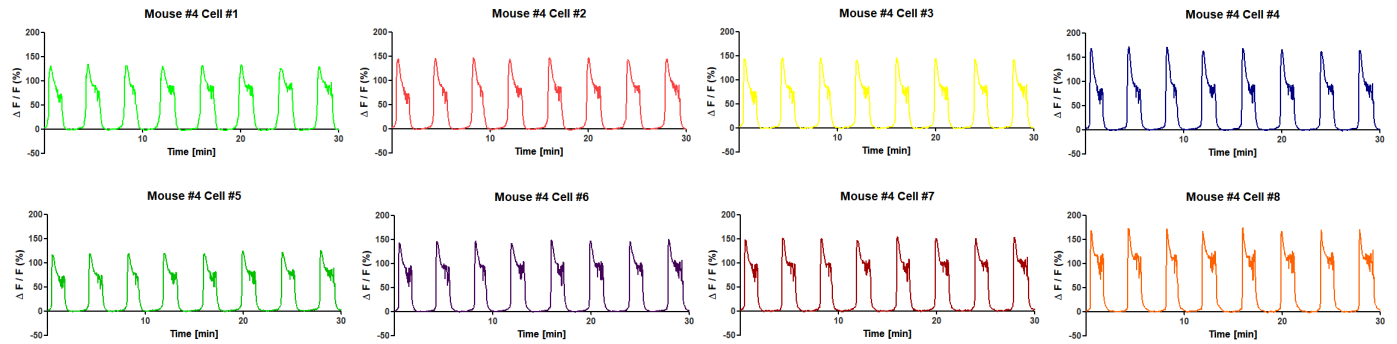

**Supplementary Figure S3.** Individual  $\text{Ca}^{2+}$  profile of kisspeptin neurons from 4 different mice.

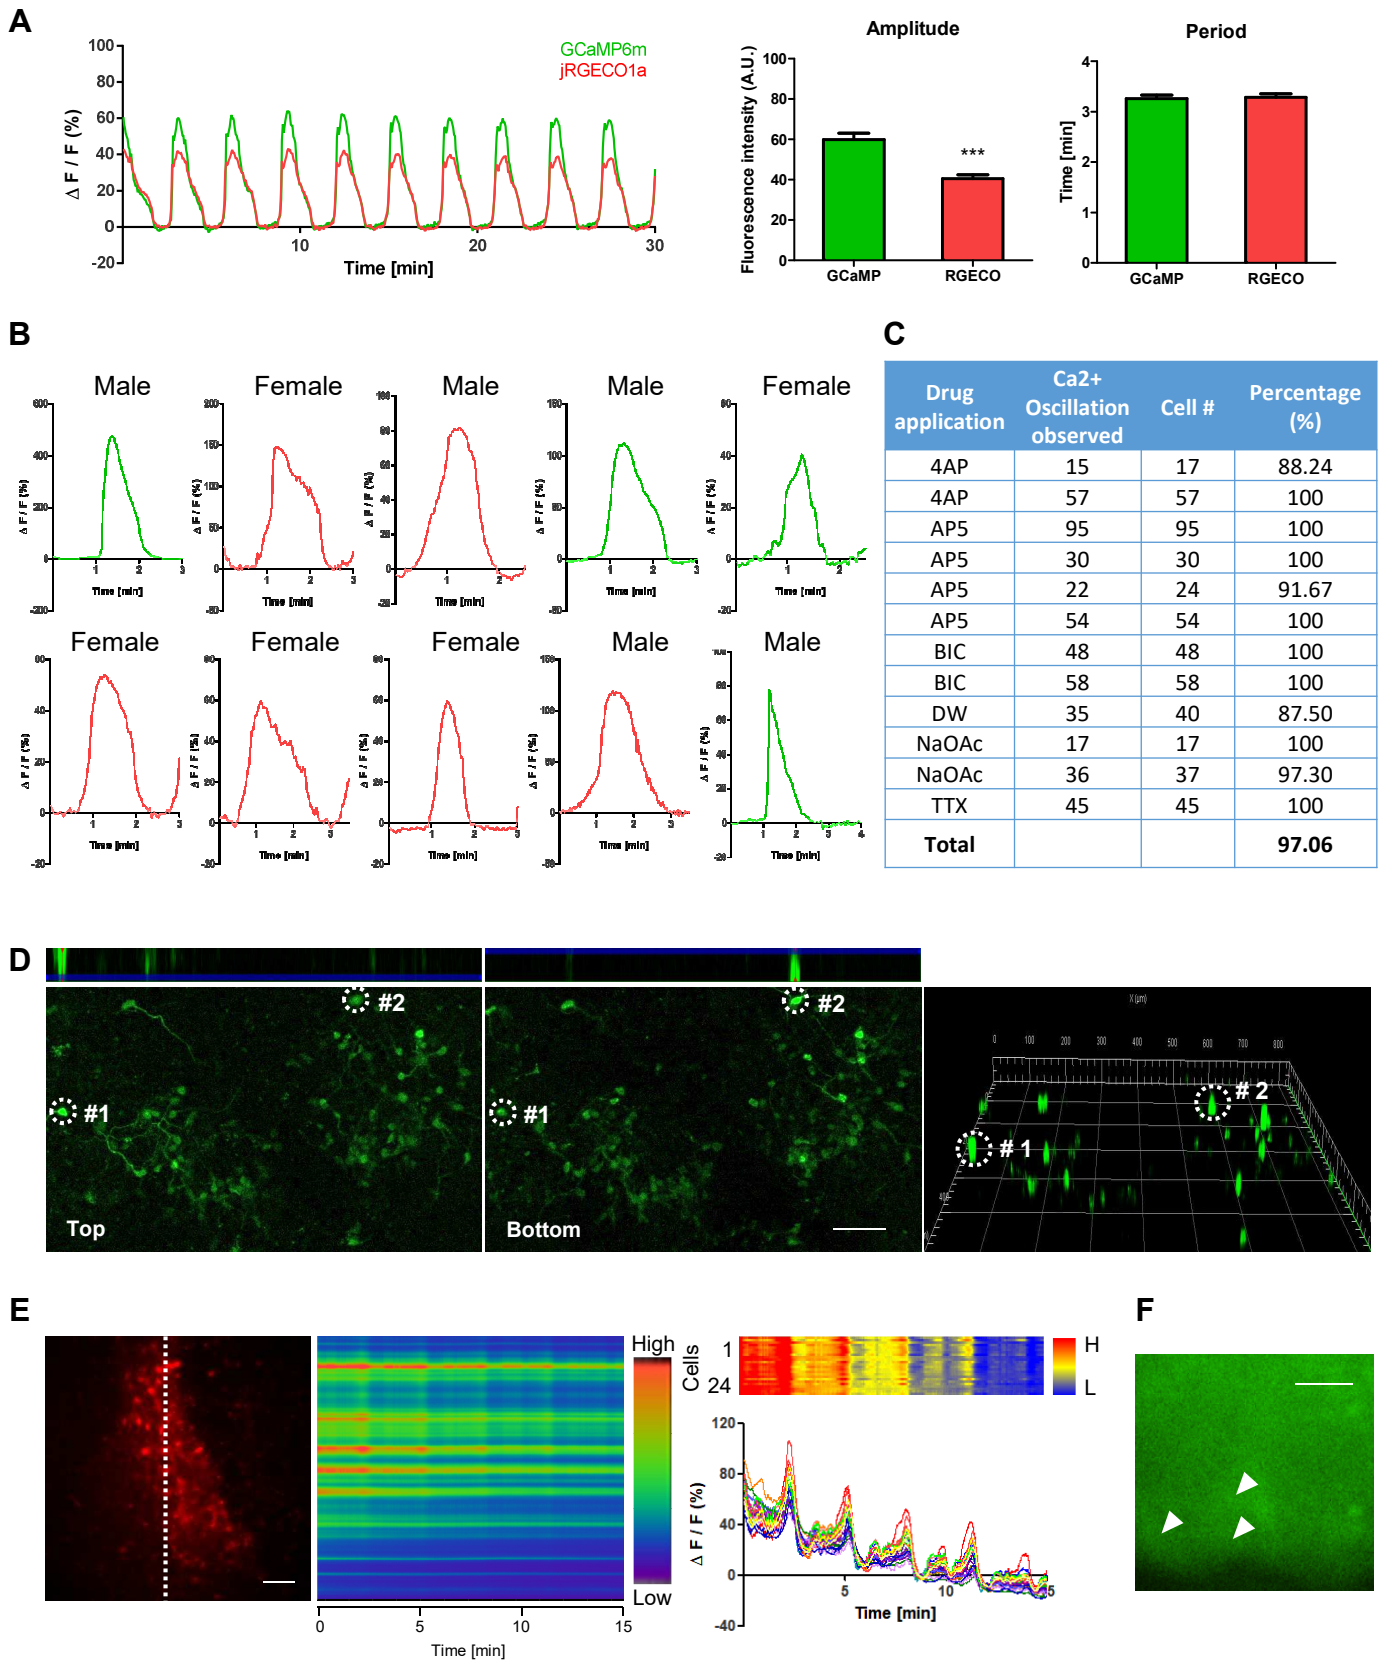

**Supplementary Figure S4.**

(A) Comparison of two fluorescent Ca<sup>2+</sup> indicators, Flex-GCaMP and Flex-RGECO, expressed from the same kisspeptin neuron. Amplitude and period of Ca<sup>2+</sup> oscillation quantified from GCaMP and RGECO (78 neurons from 3 mice, \*\*\*  $p < 0.001$ ). (B) Single peak profiles from different mice. (C) Proportion of the number of cells observing Ca<sup>2+</sup> oscillation. (D) Confocal imaging of fluorescence intensity difference according to the depth of the cell body located in the organotypic slice. Scale bar 100  $\mu$ m. 3D representation of the Z-stack image is present at right. (E) Synchronized Ca<sup>2+</sup> oscillation from horizontal slice kisspeptin neurons. (F) Dopamine transporter (*Slc6a3*; DAT)-IRES-Cre mice transduced with AAV<sub>2/1</sub>-hSyn-Flex-GCaMP6m. Scale bar 200  $\mu$ m.

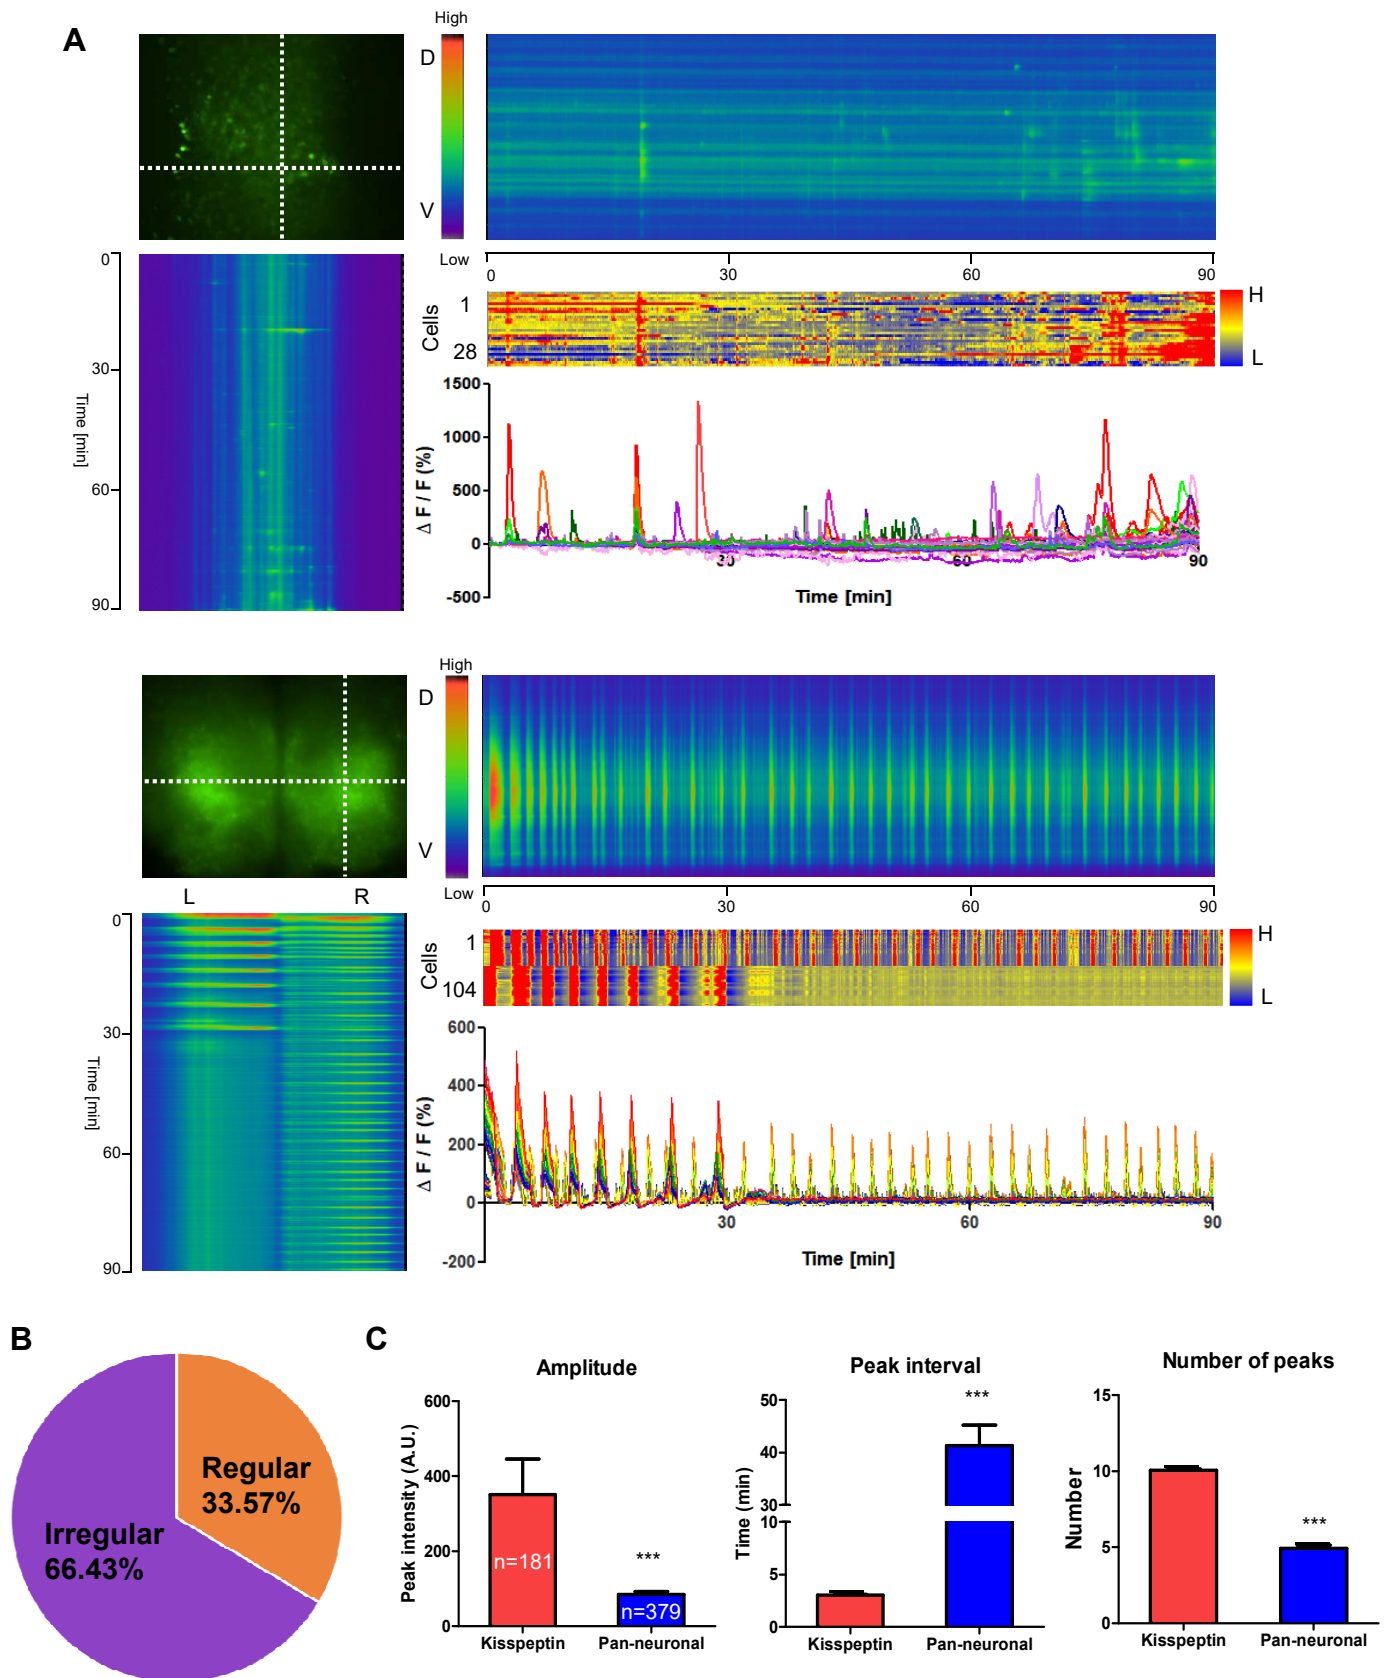

**Supplementary Figure S5.**

(A) Representative image and change in fluorescence intensity of the indicated horizontal and vertical lines in pan-neuronal imaging from 2 wild type mice. (B) Proportion of cells exhibiting regular and irregular fluctuation of  $\text{Ca}^{2+}$  concentrations from 5 wild type mice. (C) Amplitude, period, and the number of peaks of  $\text{Ca}^{2+}$  oscillation in kisspeptin and pan-neuronal population. (181-379 neurons from 4-5 mice, \*\*\*  $p < 0.001$ ).

**A**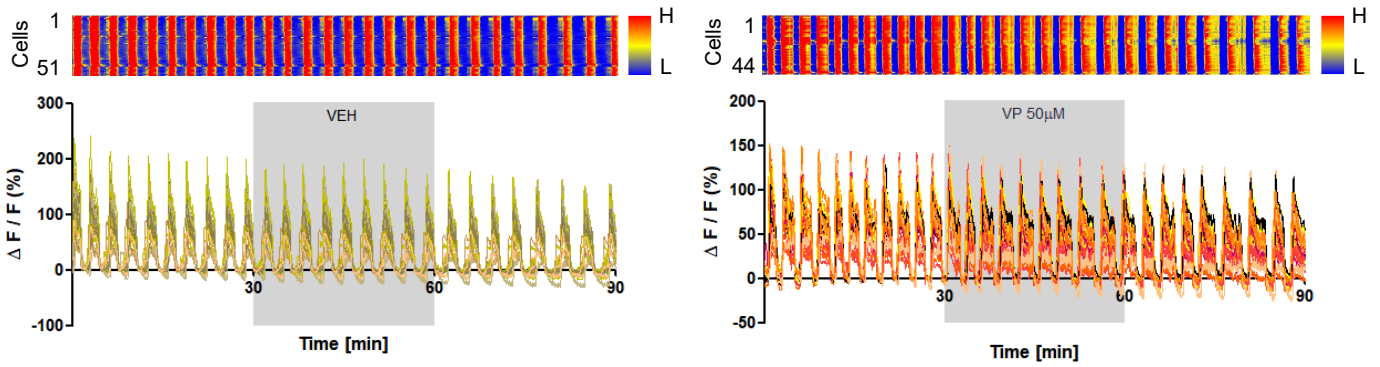**B**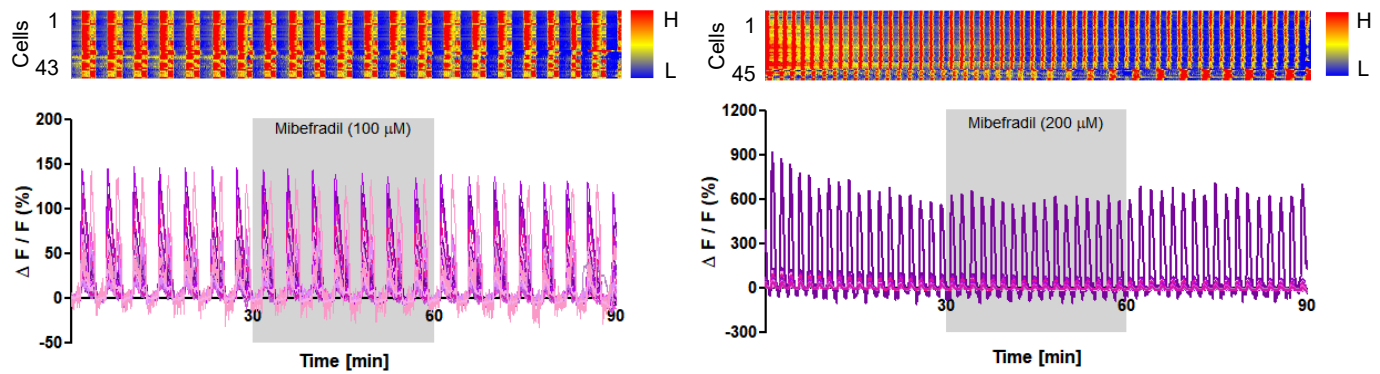**C**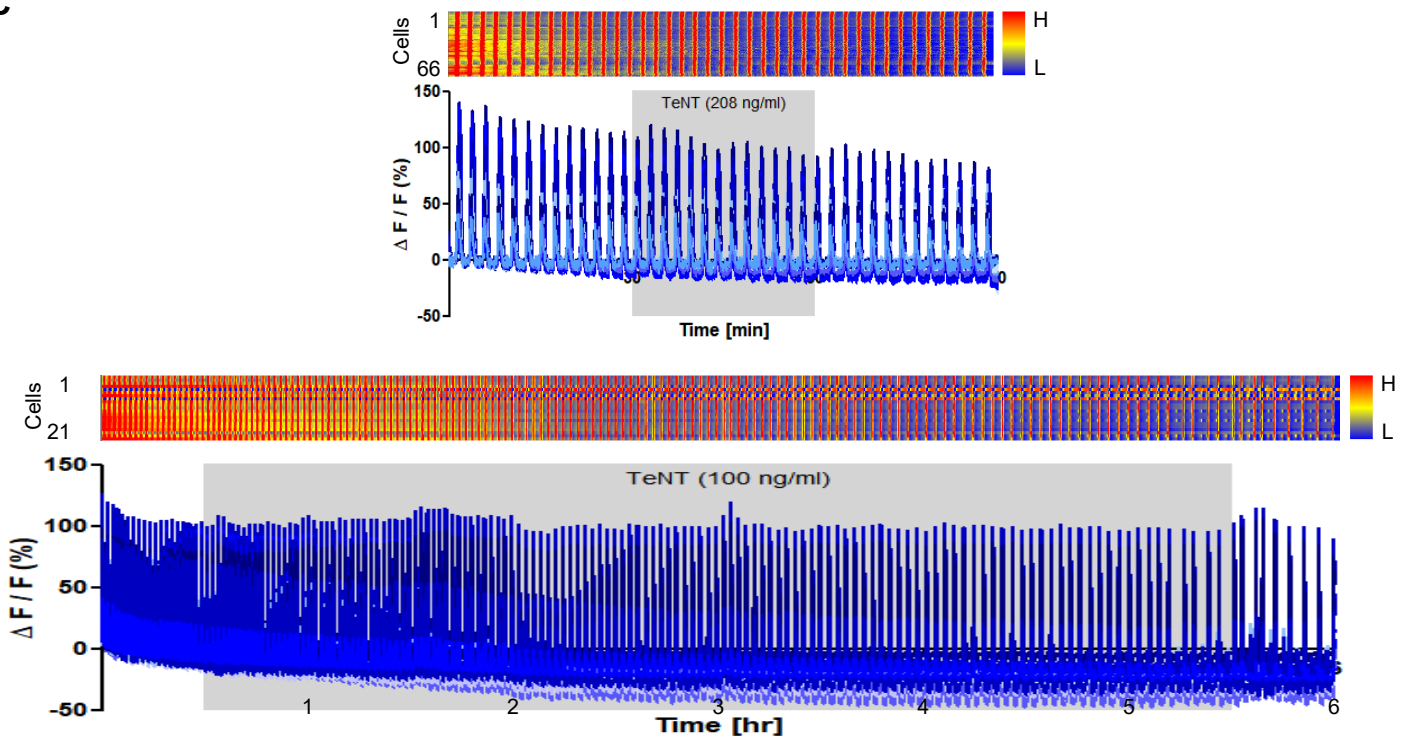

### Supplementary Figure S6.

(A) Effect of administration of vehicle (0.03% methanol) and L-type voltage-gated  $\text{Ca}^{2+}$  channel blocker (verapamil, VP, 50  $\mu\text{M}$ ). (B) Administration of T-type voltage-gated  $\text{Ca}^{2+}$  channel blocker with two doses (Mibefradil, 100  $\mu\text{M}$  and 200  $\mu\text{M}$ ). (C) Raster plot and quantified graph of  $\text{Ca}^{2+}$  oscillation with synaptic release blocker tetanus toxin (TeNT) administration 208 ng/ml for 30 min (upper) and 100 ng/ml for 5 hr (bottom).

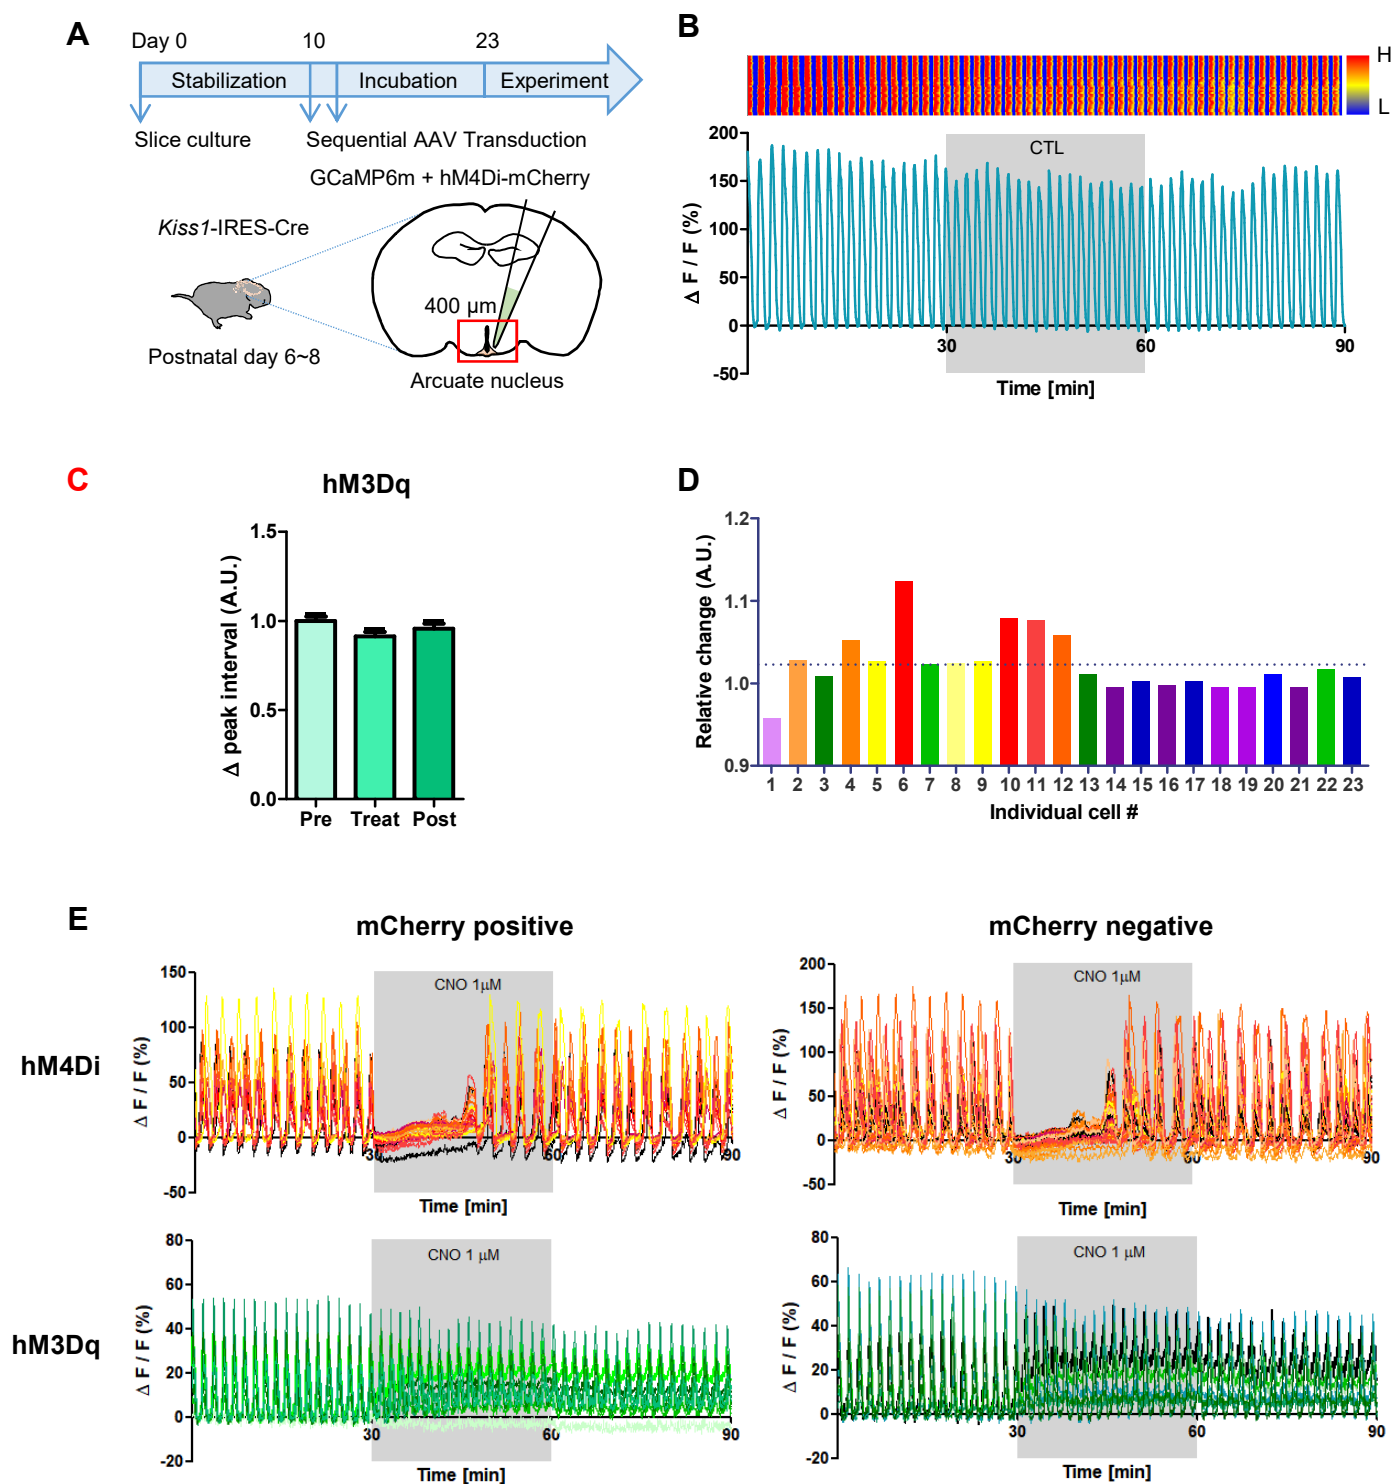

### Supplementary Figure S7.

- (A) Experimental scheme for chemogenetic modulation of ARN kisspeptin neurons and  $\text{Ca}^{2+}$  imaging. (B) Control (CTL, 0.01% distilled water in recording media) treatment for DREADD experiment. (C)  $\Delta$  peak interval in hM3Dq (62 neurons from 2 mice) experiment. (D) Fold change of individual neurons transduced with hM3Dq after CNO treatment (activation). Dotted line indicates the average value. (E) mCherry-positive and -negative neurons distinguished.

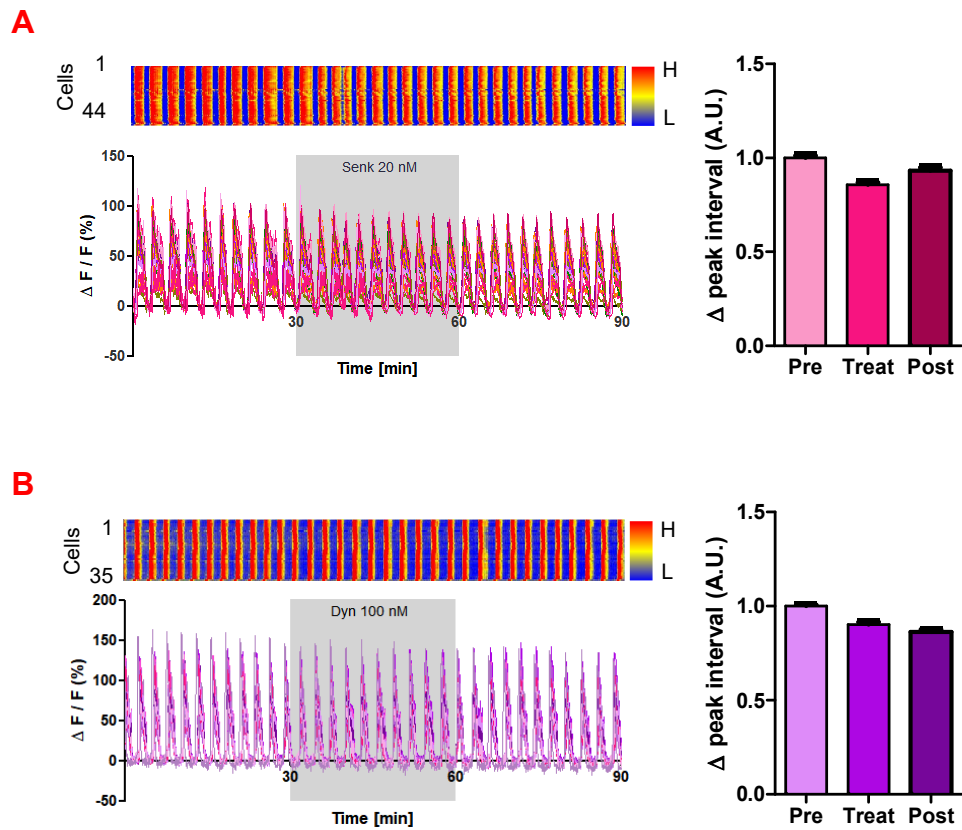

### Supplementary Figure S8.

(A) NK3R agonist senktide administered for longer time at lower dose (Senk 20nM).  $\Delta$  Peak interval in the pre-, treat, and post- phases are analyzed from 103 neurons from 3 mice (1 male and 2 females). (B) Dyn administered for longer time at lower dose (100nM).  $\Delta$  Peak interval in the pre-, treat, and post- phases are analyzed from 89 neurons from 2 female mice.
